# Supplementary material
Source: ML conference proceedings conference paper supplement (https://openaccess.thecvf.com/content/CVPR2026/html/Chen_D-Convexity_A_Unified_CVPR_2026_paper.html)
Supplement: Supplementary file 1 [file Chen_D-Convexity_A_Unified_CVPR_2026_supplemental.pdf]

# D-Convexity: A Unified Differentiable Convex Shape Prior via Quasi-Concavity for Data-driven Image Segmentation

## Supplementary Material

### A. Proof of Theorem 1

**Zero-order quasi-concavity condition:**  $u \in C^0$  is quasi-concave  $\iff$  For any  $\mathbf{x}, \mathbf{y} \in \Omega$ ,  $\lambda \in [0, 1]$ ,  $u(\lambda\mathbf{x} + (1 - \lambda)\mathbf{y}) \geq \min\{u(\mathbf{x}), u(\mathbf{y})\}$ .

*Proof.* ( $\implies$ ) Denote  $\gamma = \min\{u(\mathbf{x}), u(\mathbf{y})\}$ . Apparently  $u(\mathbf{x}), u(\mathbf{y}) \geq \gamma$ , which means  $\mathbf{x}, \mathbf{y} \in S_\gamma$ . Given that  $u$  is quasi-concave, its super-level set  $S_\gamma$  is convex. Therefore, any convex combination of  $\mathbf{x}, \mathbf{y}$ , i.e.  $\lambda\mathbf{x} + (1 - \lambda)\mathbf{y} \in S_\gamma$ . This means  $u(\lambda\mathbf{x} + (1 - \lambda)\mathbf{y}) \geq \gamma = \min\{u(\mathbf{x}), u(\mathbf{y})\}$ .

( $\impliedby$ ) For any  $\gamma$ , consider  $\mathbf{x}, \mathbf{y} \in S_\gamma$ . By definition,  $u(\mathbf{x}), u(\mathbf{y}) \geq \gamma$ . Therefore,  $u(\lambda\mathbf{x} + (1 - \lambda)\mathbf{y}) \geq \min\{u(\mathbf{x}), u(\mathbf{y})\} \geq \gamma$ . This means the convex combination  $\lambda\mathbf{x} + (1 - \lambda)\mathbf{y} \in S_\gamma$ , i.e.  $u$ 's super-level set is convex, and  $u$  is quasi-concave.  $\square$

### B. Proof of Lemma 1

**Supporting hyperplane given by the gradient:** Let  $u : \Omega \rightarrow \mathbb{R}$  be a  $C^1$  function. Fix  $\gamma \in \mathbb{R}$  and consider the super-level set  $S_\gamma := \{\mathbf{x} \in \Omega | u(\mathbf{x}) \geq \gamma\}$ . Assume  $S_\gamma$  is convex. Let  $\mathbf{y} \in \partial S_\gamma$  be a boundary point with  $u(\mathbf{y}) = \gamma$  and suppose  $\nabla u(\mathbf{y}) \neq 0$ . Then the affine hyperplane,

$$T_{\mathbf{y}} := \{\mathbf{x} \in \Omega | \nabla u(\mathbf{y})^\top (\mathbf{x} - \mathbf{y}) = 0\} \quad (15)$$

is a supporting hyperplane of  $S_\gamma$  at  $\mathbf{y}$ , i.e.  $S_\gamma$  is contained in the closed half-space

$$S_\gamma \subset H_{\mathbf{y}} := \{\mathbf{x} \in \Omega | \nabla u(\mathbf{y})^\top (\mathbf{x} - \mathbf{y}) \geq 0\}. \quad (16)$$

In particular,  $T_{\mathbf{y}}$  is also tangent to the contour  $\partial S_\gamma = \{\mathbf{x} \in \Omega | u(\mathbf{x}) = \gamma\}$ , therefore the normal vector of any supporting hyperplane at  $\mathbf{y}$  can be chosen parallel to  $\nabla u(\mathbf{y})$ .

*Proof.* Since  $u \in C^1$ , the first-order Taylor expansion at  $\mathbf{y}$  gives, for  $\mathbf{x}$  near  $\mathbf{y}$ ,

$$v(\mathbf{x}) := u(\mathbf{x}) - u(\mathbf{y}) = \nabla u(\mathbf{y})^\top (\mathbf{x} - \mathbf{y}) + r(\mathbf{x}), \quad (17)$$

$$\text{where } \frac{r(\mathbf{x})}{\|\mathbf{x} - \mathbf{y}\|} \rightarrow 0 \text{ as } \mathbf{x} \rightarrow \mathbf{y}. \quad (18)$$

Take any  $\mathbf{x} \in S_\gamma$  (so  $u(\mathbf{x}) \geq u(\mathbf{y})$ ). Because  $S_\gamma$  is convex and  $\mathbf{y} \in \partial S_\gamma$ , the line segment

$$\ell(t) := \mathbf{y} + t(\mathbf{x} - \mathbf{y}), \quad t \in [0, 1], \quad (19)$$

lies in  $S_\gamma$ . Define the scalar function  $\phi(t) := u(\ell(t))$ . Note that  $\phi(0) = u(\mathbf{y})$  and  $\phi(1) = u(\mathbf{x}) \geq u(\mathbf{y})$ , hence

$\phi(t) \geq u(\mathbf{y})$  for all  $t \in [0, 1]$  because each point of the segment belongs to  $S_\gamma$ . Differentiating  $\phi$  at  $t = 0$  yields

$$\phi'(0) = \nabla u(\mathbf{y})^\top (\mathbf{x} - \mathbf{y}). \quad (20)$$

Since  $\phi(t) \geq \phi(0)$  for small positive  $t$ , we must have  $\phi'(0) \geq 0$ , i.e.

$$\nabla u(\mathbf{y})^\top (\mathbf{x} - \mathbf{y}) \geq 0. \quad (21)$$

This inequality exactly says that the affine hyperplane  $T_{\mathbf{y}}$  is supporting, since every  $\mathbf{x} \in S_\gamma$  lies in the closed half-space determined by  $T_{\mathbf{y}}$ .

Since  $\nabla u(\mathbf{y}) \neq 0$ , the Implicit Function Theorem implies that the contour  $\{\mathbf{x} \in \Omega | u(\mathbf{x}) = \gamma\}$  is a  $C^1$  hypersurface in a neighborhood of  $\mathbf{y}$ . Its tangent space at  $\mathbf{y}$  is the kernel of  $\nabla u(\mathbf{y})$ , i.e.

$$\begin{aligned} T_{\mathbf{y}} &= \ker(\nabla u(\mathbf{y})) = \{\mathbf{d} | \nabla u(\mathbf{y})^\top \mathbf{d} = 0\} \\ &= \{\mathbf{x} \in \Omega | \nabla u(\mathbf{y})^\top (\mathbf{x} - \mathbf{y}) = 0\}. \end{aligned} \quad (22)$$

If a supporting hyperplane at  $\mathbf{y}$  has normal  $\mathbf{n}$ , then by uniqueness of the tangent (since  $u$  is differentiable and  $\nabla u(\mathbf{y}) \neq 0$ ) we have  $\mathbf{n}$  parallel to  $\nabla u(\mathbf{y})$ , which proves the final claim.  $\square$

### C. Proof of Theorem 2

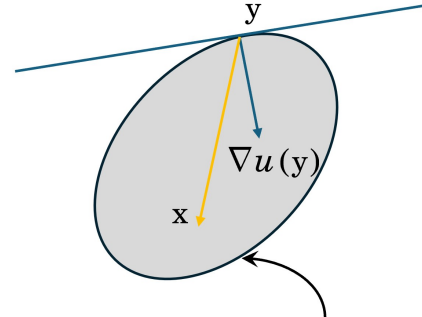

$$S(\gamma) = \{\mathbf{x} \in \Omega | u(\mathbf{x}) \geq \gamma\}$$

Figure 5. Illustration of the first-order condition. If  $u(\mathbf{x}) \geq u(\mathbf{y})$ , then vectors  $\mathbf{x} - \mathbf{y}$  and  $\nabla u(\mathbf{y})$  must form an acute angle.

**First-order quasi-concavity condition:**  $u \in C^1$  is quasi-concave  $\iff$  If  $u(\mathbf{x}) \geq u(\mathbf{y})$ , then  $\nabla u(\mathbf{y})^\top (\mathbf{x} - \mathbf{y}) \geq 0$ .

*Proof.* ( $\implies$ ) Suppose  $u$  is quasi-concave. Then every super-level set  $S_\gamma = \{\mathbf{x} \in \Omega | u(\mathbf{x}) \geq \gamma\}$  is convex. According

to Lemma 1, for any boundary point  $\mathbf{y}$  with  $u(\mathbf{y}) = \gamma$ , if  $\nabla u(\mathbf{y}) = 0$ , the condition holds trivially. Otherwise,  $S_\gamma$  is contained in the closed half space of  $T_{\mathbf{y}}$ , i.e.

$$\begin{aligned} u(\mathbf{x}) \geq \gamma = u(\mathbf{y}) &\Rightarrow \mathbf{x} \in S_\gamma \\ &\Rightarrow \mathbf{x} \in H_{\mathbf{y}} = \{\mathbf{x} \in \Omega \mid \nabla u(\mathbf{y})^\top (\mathbf{x} - \mathbf{y}) \geq 0\}. \end{aligned} \quad (23)$$

Since  $\gamma$  is arbitrary, for any  $\mathbf{x}, \mathbf{y}$  with  $u(\mathbf{x}) \geq u(\mathbf{y})$ , we have  $\nabla u(\mathbf{y})^\top (\mathbf{x} - \mathbf{y}) \geq 0$ .

( $\Leftarrow$ ) Conversely, fix any  $\gamma$  and consider the super-level set  $S_\gamma$ . Take arbitrary  $\mathbf{x}_0, \mathbf{x}_1 \in S_\gamma$  and define

$$\phi(t) = u((1-t)\mathbf{x}_0 + t\mathbf{x}_1), \quad t \in [0, 1]. \quad (24)$$

If  $\phi$  attained a value strictly below  $\min\{\phi(0), \phi(1)\}$  at an interior  $t_0 \in (0, 1)$ , w.l.o.g, let  $\phi(1) \geq \phi(0) > \phi(t_0)$ . According to continuity and Intermediate Value Theorem, there exists an interval  $[t_0, t_1] \subset [0, 1]$  such that  $\phi(t_0) < \phi(t_1) = \phi(0)$ , and  $\phi(t) \leq \phi(0)$  when  $t \in [t_0, t_1]$ . Such an interval exists by continuity, and can be found easily by extending  $(0, \phi(0))$  along  $t$  axis and check the intersections with  $\phi(t)$ .

Take  $t \in (t_0, t_1)$ , and let  $\mathbf{x}_t = (1-t)\mathbf{x}_0 + t\mathbf{x}_1$ . By the hypothesis, since both  $u(\mathbf{x}_0), u(\mathbf{x}_1) \geq u(\mathbf{x}_t)$ ,

$$\nabla u(\mathbf{x}_t)^\top (\mathbf{x}_i - \mathbf{x}_t) \geq 0, \quad i = 0, 1, \quad (25)$$

which gives

$$\begin{aligned} t\nabla u(\mathbf{x}_t)^\top (\mathbf{x}_0 - \mathbf{x}_1) &\geq 0, \\ (1-t)\nabla u(\mathbf{x}_t)^\top (\mathbf{x}_0 - \mathbf{x}_1) &\leq 0, \end{aligned} \quad (26)$$

collectively,

$$\nabla u(\mathbf{x}_t)^\top (\mathbf{x}_1 - \mathbf{x}_0) = 0, \quad \forall t \in (t_0, t_1). \quad (27)$$

According to Mean Value Theorem, there exists  $t^* \in (t_0, t_1)$ , such that

$$\begin{aligned} 0 < \phi(t_1) - \phi(t_0) &= \nabla u(\mathbf{x}_{t^*})^\top (\mathbf{x}_{t_1} - \mathbf{x}_{t_0}) \\ &= (t_1 - t_0)\nabla u(\mathbf{x}_{t^*})^\top (\mathbf{x}_1 - \mathbf{x}_0) = 0, \end{aligned} \quad (28)$$

which is contradictory. Therefore  $\phi(t) \geq \min\{\phi(0), \phi(1)\}$  for all  $t$ , so the segment  $[\mathbf{x}_0, \mathbf{x}_1] \subset S_\gamma$ . Hence  $S_\gamma$  is convex. Since  $\gamma$  was arbitrary,  $u$  is quasi-concave.  $\square$

## D. Proof of Theorem 5

**Second-order quasi-concavity sufficient condition:** Let  $u \in C^2$ , if the Hessian  $\nabla^2 u(\mathbf{x}) \prec 0$  (strict negative definite) on tangent space  $T_{\mathbf{x}}$  for all  $\mathbf{x} \in \Omega$  such that  $\nabla u(\mathbf{x}) \neq 0$ , then  $u \in C^2$  is quasi-concave.

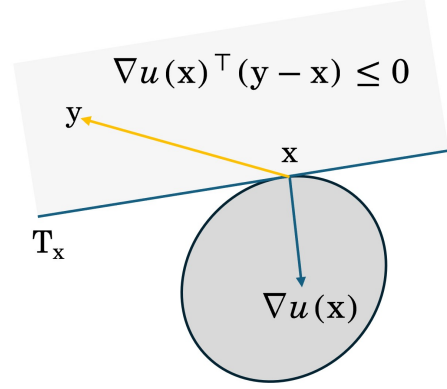

Figure 6. Illustration of the second-order condition. For fixed  $\mathbf{x}$ , if  $u$  is quasi-concave, then on the half space  $\nabla u(\mathbf{x})^\top (\mathbf{y} - \mathbf{x}) \leq 0$ , maximum value of  $u$  is taken at  $\mathbf{x}$ .

*Proof.* Fix any  $\gamma$  and consider the super-level set  $S_\gamma$ . Take arbitrary  $\mathbf{x}_0, \mathbf{x}_1 \in S_\gamma$  and define

$$\begin{aligned} \phi(t) &= u((1-t)\mathbf{x}_0 + t\mathbf{x}_1), \quad t \in [0, 1], \\ \mathbf{x}_t &= (1-t)\mathbf{x}_0 + t\mathbf{x}_1. \end{aligned} \quad (29)$$

If  $\phi$  attained a value strictly below  $\min\{\phi(0), \phi(1)\}$  at an interior  $t_0 \in (0, 1)$ , without loss of generality, let  $\phi(1) \geq \phi(0) > \phi(t_0)$ . Then according to continuity and Extreme Value Theorem,  $\phi$  attains a strict interior minimum at some  $t^* \in (0, 1)$  such that  $\phi(1) \geq \phi(0) > \phi(t^*)$ . At this  $t^*$ , we have  $\phi'(t^*) = 0, \phi''(t^*) \geq 0$ . Further,  $\phi'(t^*) = 0$  implies

$$\phi'(t^*) = \nabla u(\mathbf{x}_{t^*})^\top (\mathbf{x}_1 - \mathbf{x}_0) = 0, \quad (30)$$

which means  $\mathbf{x}_1 - \mathbf{x}_0 \in T_{\mathbf{x}_{t^*}}$ . According to the negative definite hypothesis,

$$(\mathbf{x}_1 - \mathbf{x}_0)^\top \nabla^2 u(\mathbf{x}_{t^*})(\mathbf{x}_1 - \mathbf{x}_0) < 0. \quad (31)$$

However, this contradicts with

$$\phi''(t^*) = (\mathbf{x}_1 - \mathbf{x}_0)^\top \nabla^2 u(\mathbf{x}_{t^*})(\mathbf{x}_1 - \mathbf{x}_0) \geq 0. \quad (32)$$

Therefore, for all  $t$ ,  $\phi(t) \geq \min\{\phi(0), \phi(1)\}$ , so the segment  $[\mathbf{x}_0, \mathbf{x}_1] \subset S_\gamma$ . Hence  $S_\gamma$  is convex. Since  $\gamma$  was arbitrary,  $u$  is quasi-concave.  $\square$

## E. Explicit form of convex loss gradient

In the proposed convex gradient projection module, the term  $\nabla_u \mathcal{L}_{convex}(u)$  can be either computed by auto-gradient, or by using an explicit form, and both approaches are efficient. Let  $D_x, D_y, D_{xx}, D_{yy}, D_{xy}$  be fixed linear convolution operators with adjoints  $D_x^\top, D_y^\top, D_{xx}^\top, D_{yy}^\top, D_{xy}^\top$  realizing first

and second order finite differences. Specifically,

$$\begin{aligned} D_x &= \begin{bmatrix} 0 & 0 & 0 \\ 0 & -1 & 0 \\ 0 & 1 & 0 \end{bmatrix}, D_{xx} = D_x^\top D_x = \begin{bmatrix} 0 & 1 & 0 \\ 0 & -2 & 0 \\ 0 & 1 & 0 \end{bmatrix}, \\ D_y &= \begin{bmatrix} 0 & 0 & 0 \\ 0 & -1 & 1 \\ 0 & 0 & 0 \end{bmatrix}, D_{yy} = D_y^\top D_y = \begin{bmatrix} 0 & 0 & 0 \\ 1 & -2 & 1 \\ 0 & 0 & 0 \end{bmatrix}, \\ D_{xy} = D_{yx} &= \frac{1}{2}(D_y D_x + D_x D_y) = \frac{1}{2} \begin{bmatrix} 0 & 0 & 0 \\ 0 & -1 & 1 \\ 0 & 1 & -1 \end{bmatrix}. \end{aligned} \quad (33)$$

For any function  $u : \Omega \rightarrow [0, 1]$  define

$$\begin{aligned} u_x &= D_x u, & u_y &= D_y u, \\ u_{xx} &= D_{xx} u, & u_{yy} &= D_{yy} u, & u_{xy} &= D_{xy} u. \end{aligned} \quad (34)$$

**Explicit gradient of  $\mathcal{L}_{2nd}$ .** The loss is

$$\mathcal{L}_{2nd}(u) = \frac{1}{|\Omega|} \sum_{\mathbf{x} \in \Omega} \|\nabla u(\mathbf{x})\| R(\mathbf{x}), \quad (35)$$

where  $R = \text{ReLU}(Q_2 + \delta)$ , and  $H = \mathbf{1}[Q_2 + \delta > 0]$  (indicator function). Therefore,

$$\begin{aligned} \nabla_u \mathcal{L}_{2nd}(u) &= \frac{1}{|\Omega|} \sum_{\mathbf{x} \in \Omega} [\nabla_u \|\nabla u(\mathbf{x})\| R(\mathbf{x}) \\ &\quad + \|\nabla u(\mathbf{x})\| \nabla_u R(\mathbf{x})]. \end{aligned} \quad (36)$$

With  $Q_2 = u_x^2 u_{yy} - 2u_x u_y u_{xy} + u_y^2 u_{xx}$ , the pointwise partial derivatives are

$$\begin{aligned} \frac{\partial Q_2}{\partial u_x} &= 2u_x u_{yy} - 2u_y u_{xy}, & \frac{\partial Q_2}{\partial u_y} &= 2u_y u_{xx} - 2u_x u_{xy}, \\ \frac{\partial Q_2}{\partial u_{xx}} &= u_y^2, & \frac{\partial Q_2}{\partial u_{yy}} &= u_x^2, & \frac{\partial Q_2}{\partial u_{xy}} &= -2u_x u_y. \end{aligned} \quad (37)$$

Since  $u_x = D_x u$  etc. are linear in  $u$ , the chain rule with operator adjoints gives the discrete gradient

$$\begin{aligned} \nabla_u Q_2(u) &= D_{xx}^\top (u_y^2) + D_{yy}^\top (u_x^2) + D_{xy}^\top (-2u_x u_y) \\ &\quad + D_x^\top (2u_x u_{yy} - 2u_y u_{xy}) + D_y^\top (2u_y u_{xx} - 2u_x u_{xy}). \end{aligned} \quad (38)$$

For numerical stability use the smoothed magnitude

$$\|\nabla u\| = \sqrt{u_x^2 + u_y^2 + \varepsilon} \quad (\varepsilon > 0), \quad (39)$$

then

$$\frac{\partial \|\nabla u\|}{\partial u_x} = \frac{u_x}{\|\nabla u\|}, \quad \frac{\partial \|\nabla u\|}{\partial u_y} = \frac{u_y}{\|\nabla u\|}, \quad (40)$$

and the chain rule yields

$$\nabla_u \|\nabla u\| = D_x^\top \left( \frac{u_x}{\|\nabla u\|} \right) + D_y^\top \left( \frac{u_y}{\|\nabla u\|} \right). \quad (41)$$

Substituting above with  $\nabla_u R = H \nabla_u Q_2$  gives

$$\begin{aligned} \nabla_u \mathcal{L}_{2nd}(u) &= \frac{1}{|\Omega|} \left[ \underbrace{D_x^\top \left( R \frac{u_x}{\|\nabla u\|} \right) + D_y^\top \left( R \frac{u_y}{\|\nabla u\|} \right)}_{\text{through } g = \|\nabla u\|_\varepsilon} \right. \\ &\quad + \underbrace{D_x^\top \left( \|\nabla u\| H (2u_x u_{yy} - 2u_y u_{xy}) \right)}_{\text{via } \partial Q_2 / \partial u_x} \\ &\quad + \underbrace{D_y^\top \left( \|\nabla u\| H (2u_y u_{xx} - 2u_x u_{xy}) \right)}_{\text{via } \partial Q_2 / \partial u_y} \\ &\quad + \underbrace{D_{xx}^\top (\|\nabla u\| H u_y^2) + D_{yy}^\top (\|\nabla u\| H u_x^2)}_{\text{via } \partial Q_2 / \partial u_{xx}, \partial Q_2 / \partial u_{yy}} \\ &\quad \left. + \underbrace{D_{xy}^\top (\|\nabla u\| H (-2u_x u_y))}_{\text{via } \partial Q_2 / \partial u_{xy}} \right]. \end{aligned} \quad (42)$$

With the elementwise sigmoid  $u = \sigma(o) = 1/(1 + e^{-o})$  one has  $\frac{\partial u}{\partial o} = u(1 - u)$ , hence

$$\nabla_o \mathcal{L}_{2nd}(u(o)) = (\nabla_u \mathcal{L}_{2nd}(u)) \odot u(1 - u).$$

**Explicit gradient of  $\mathcal{L}_{1st}$ .** Let  $D_x, D_y$  be fixed linear convolution operators and write

$$\nabla u(\mathbf{y}) = (D_x u(\mathbf{y}), D_y u(\mathbf{y}))^\top. \quad (43)$$

For a temperature  $\varepsilon > 0$  define the smoothed sigmoid

$$\sigma_\varepsilon(t) = \frac{1}{1 + e^{-t/\varepsilon}}, \quad \sigma'_\varepsilon(t) = \frac{1}{\varepsilon} \sigma_\varepsilon(t)(1 - \sigma_\varepsilon(t)). \quad (44)$$

Given a neighborhood  $\mathcal{N}_y \subset \Omega$  around each  $\mathbf{y}$ , set for every ordered pair  $(\mathbf{x}, \mathbf{y})$  with  $\mathbf{x} \in \mathcal{N}_y$ :

$$\begin{aligned} S(\mathbf{x}, \mathbf{y}) &= \sigma_\varepsilon(u(\mathbf{x}) - u(\mathbf{y})), & \mathbf{v}_{\mathbf{x}, \mathbf{y}} &= \mathbf{x} - \mathbf{y}, \\ R(\mathbf{x}, \mathbf{y}) &= H(\mathbf{x}, \mathbf{y}) (-\nabla u(\mathbf{y})^\top \mathbf{v}_{\mathbf{x}, \mathbf{y}}), \end{aligned} \quad (45)$$

where  $H(\mathbf{x}, \mathbf{y}) = \mathbf{1}[\nabla u(\mathbf{y})^\top \mathbf{v}_{\mathbf{x}, \mathbf{y}} < 0]$ . The loss reads

$$\mathcal{L}_{1st}(u) = \frac{1}{|\Omega|} \sum_{\mathbf{y} \in \Omega} \sum_{\mathbf{x} \in \mathcal{N}_y} S(\mathbf{x}, \mathbf{y}) R(\mathbf{x}, \mathbf{y}).$$

For any pixel  $p \in \Omega$ , the partial derivative  $[\nabla_u \mathcal{L}_{1st}(u)](p)$  collects all terms in which  $u(p)$  appears. There are three kinds of appearances.

(A)  $u(p)$  as a ‘‘source’’ value  $u(\mathbf{x})$  in  $S(\mathbf{x}, \mathbf{y})$ . Here  $u(\mathbf{x})$  contributes when  $\mathbf{x} = p$  and  $p \in \mathcal{N}_y$ :

$$\frac{\partial S(\mathbf{x}, \mathbf{y})}{\partial u(p)} = \begin{cases} \sigma'_\varepsilon(u(p) - u(\mathbf{y})), & \mathbf{x} = p, \\ 0, & \mathbf{x} \neq p. \end{cases} \quad (46)$$

Thus the contribution is

$$\sum_{\mathbf{y}: p \in \mathcal{N}_{\mathbf{y}}} \sigma'_\varepsilon(u(p) - u(\mathbf{y})) R(p, \mathbf{y}). \quad (47)$$

**(B)**  $u(p)$  as an ‘‘anchor’’ value  $u(\mathbf{y})$  in  $S(\mathbf{x}, \mathbf{y})$ . Here  $u(\mathbf{y})$  contributes when  $\mathbf{y} = p$  and  $\mathbf{x} \in \mathcal{N}_p$ :

$$\frac{\partial S(\mathbf{x}, \mathbf{y})}{\partial u(p)} = \begin{cases} -\sigma'_\varepsilon(u(\mathbf{x}) - u(p)), & \mathbf{y} = p, \\ 0, & \mathbf{y} \neq p. \end{cases} \quad (48)$$

Thus the contribution is

$$-\sum_{\mathbf{x} \in \mathcal{N}_p} \sigma'_\varepsilon(u(\mathbf{x}) - u(p)) R(\mathbf{x}, p). \quad (49)$$

**(C)**  $u(p)$  through the anchor gradient  $\nabla u(\mathbf{y})$  inside  $R(\mathbf{x}, \mathbf{y})$ .  $R(\mathbf{x}, \mathbf{y})$  depends on  $u$  through the anchor gradient  $\nabla u(\mathbf{y})$ . Collecting all such contributions over  $\mathbf{y}$ , the resulting gradient can be written compactly using the adjoint operators  $D_x^\top, D_y^\top$ .

Write  $v_x(\mathbf{x}, \mathbf{y}) = (\mathbf{x} - \mathbf{y})_x, v_y(\mathbf{x}, \mathbf{y}) = (\mathbf{x} - \mathbf{y})_y$ . Then

$$R(\mathbf{x}, \mathbf{y}) = -H(\mathbf{x}, \mathbf{y}) \left( D_x u(\mathbf{y}) v_x(\mathbf{x}, \mathbf{y}) + D_y u(\mathbf{y}) v_y(\mathbf{x}, \mathbf{y}) \right). \quad (50)$$

Introduce two auxiliary fields  $C_x, C_y : \Omega \rightarrow \mathbb{R}$ ,

$$\begin{aligned} C_x(p) &= -\sum_{\mathbf{x} \in \mathcal{N}_p} S(\mathbf{x}, p) H(\mathbf{x}, p) v_x(\mathbf{x}, p), \\ C_y(p) &= -\sum_{\mathbf{x} \in \mathcal{N}_p} S(\mathbf{x}, p) H(\mathbf{x}, p) v_y(\mathbf{x}, p), \end{aligned} \quad (51)$$

Therefore, the part of the objective depending on  $R$  can be rewritten as

$$\begin{aligned} &\sum_{\mathbf{y} \in \Omega} \sum_{\mathbf{x} \in \mathcal{N}_{\mathbf{y}}} S(\mathbf{x}, \mathbf{y}) R(\mathbf{x}, \mathbf{y}) \\ &= \sum_{\mathbf{y} \in \Omega} C_x(\mathbf{y}) D_x u(\mathbf{y}) + \sum_{\mathbf{y} \in \Omega} C_y(\mathbf{y}) D_y u(\mathbf{y}). \end{aligned} \quad (52)$$

To differentiate it, note that both  $D_x, D_y$  are linear operators, and we use the following standard identity: for any linear operator  $A$  and any coefficient field  $c$ ,

$$\sum_{\mathbf{y}} c(\mathbf{y}) (A u)(\mathbf{y}) = c^\top A u = (A^\top c)^\top u, \quad (53)$$

hence

$$\nabla_u \left( \sum_{\mathbf{y}} c(\mathbf{y}) (A u)(\mathbf{y}) \right) = A^\top c. \quad (54)$$

Applying this identity to the two terms gives

$$\begin{aligned} &\left( \nabla_u \sum_{\mathbf{y} \in \Omega} \sum_{\mathbf{x} \in \mathcal{N}_{\mathbf{y}}} S(\mathbf{x}, \mathbf{y}) R(\mathbf{x}, \mathbf{y}) \right)_{\text{via } R} \\ &= D_x^\top C_x + D_y^\top C_y. \end{aligned} \quad (55)$$

Summing (A)+(B)+(C),

$$\begin{aligned} [\nabla_u \mathcal{L}_{1\text{st}}(u)](p) &= \frac{1}{|\Omega|} \left[ \underbrace{\sum_{\mathbf{y}: p \in \mathcal{N}_{\mathbf{y}}} \sigma'_\varepsilon(u(p) - u(\mathbf{y})) R(p, \mathbf{y})}_{\text{via } \partial S / \partial u} \right. \\ &\quad \left. - \underbrace{\sum_{\mathbf{x} \in \mathcal{N}_p} \sigma'_\varepsilon(u(\mathbf{x}) - u(p)) R(\mathbf{x}, p)}_{\text{via } \partial S / \partial u} \right. \\ &\quad \left. + \underbrace{[D_x^\top C_x + D_y^\top C_y](p)}_{\text{via } \partial R / \partial u} \right], \end{aligned} \quad (56)$$

If  $u = \sigma(o)$  is the elementwise sigmoid of logits  $o$ , then  $\nabla_o \mathcal{L}_{1\text{st}}(u(o)) = (\nabla_u \mathcal{L}_{1\text{st}}(u)) \odot u(1 - u)$  elementwise.

F. Qualitative Visualization on ACDC Dataset.

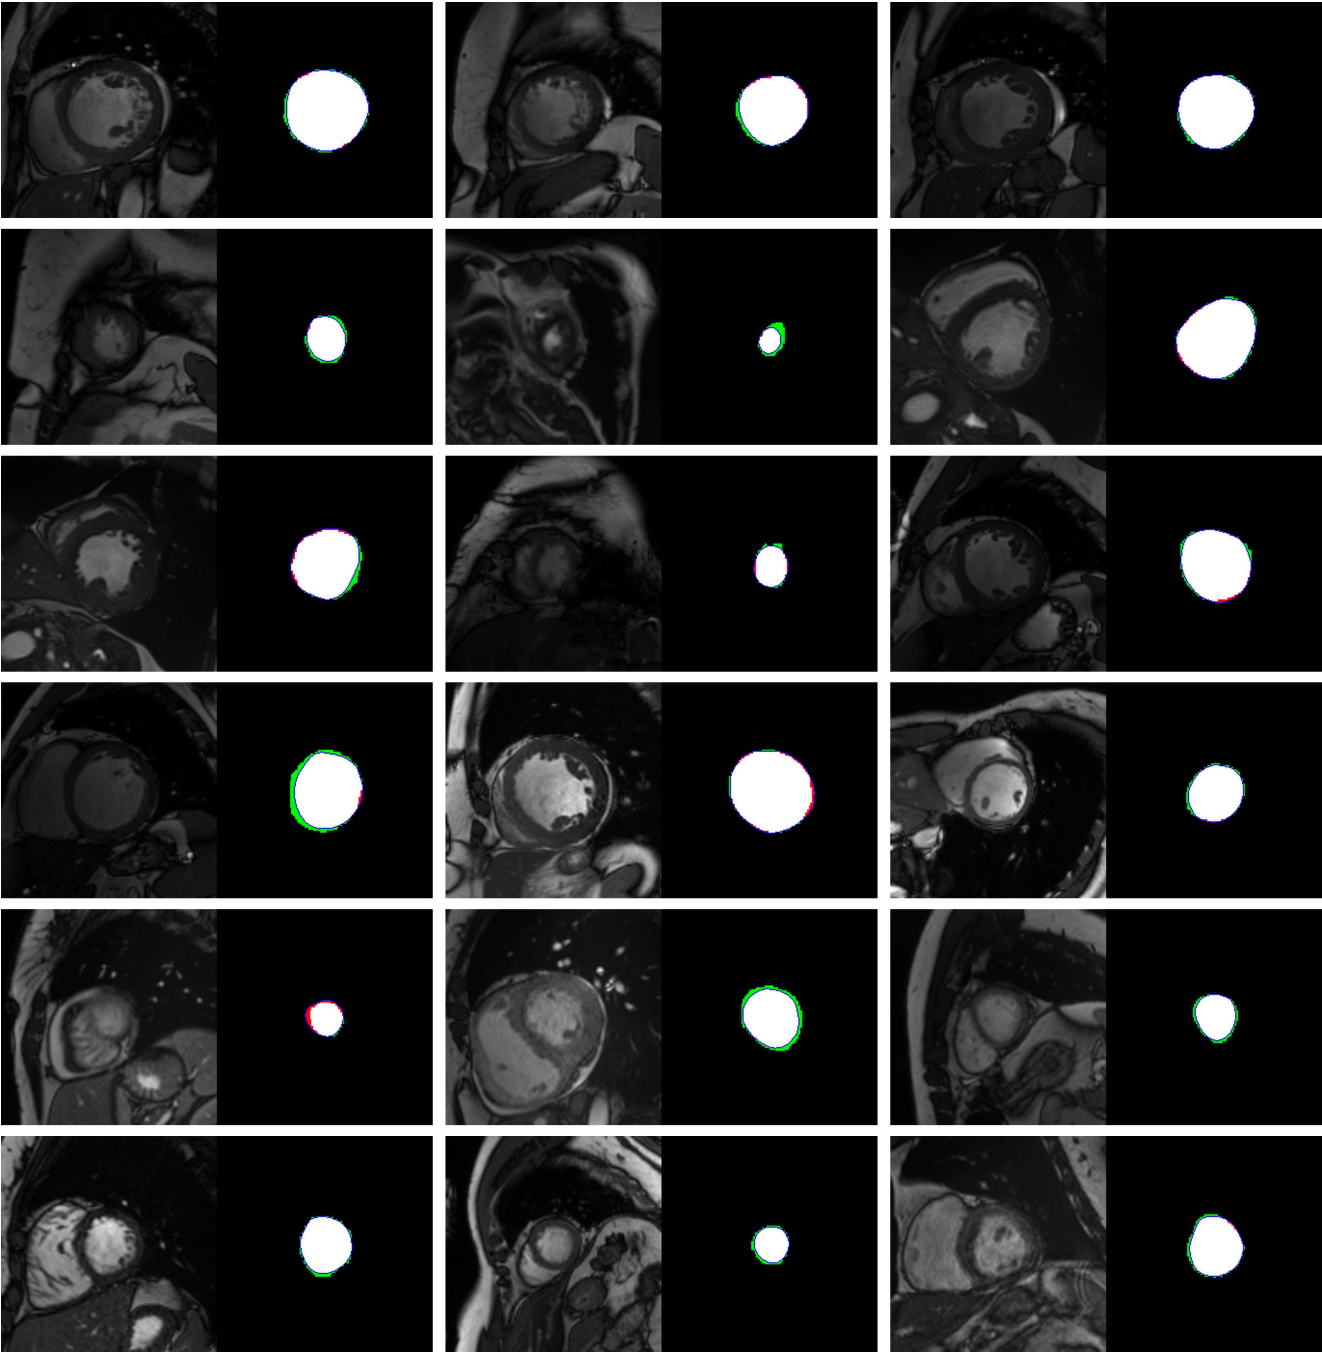

**G. Qualitative Visualization on CASIA Dataset.**

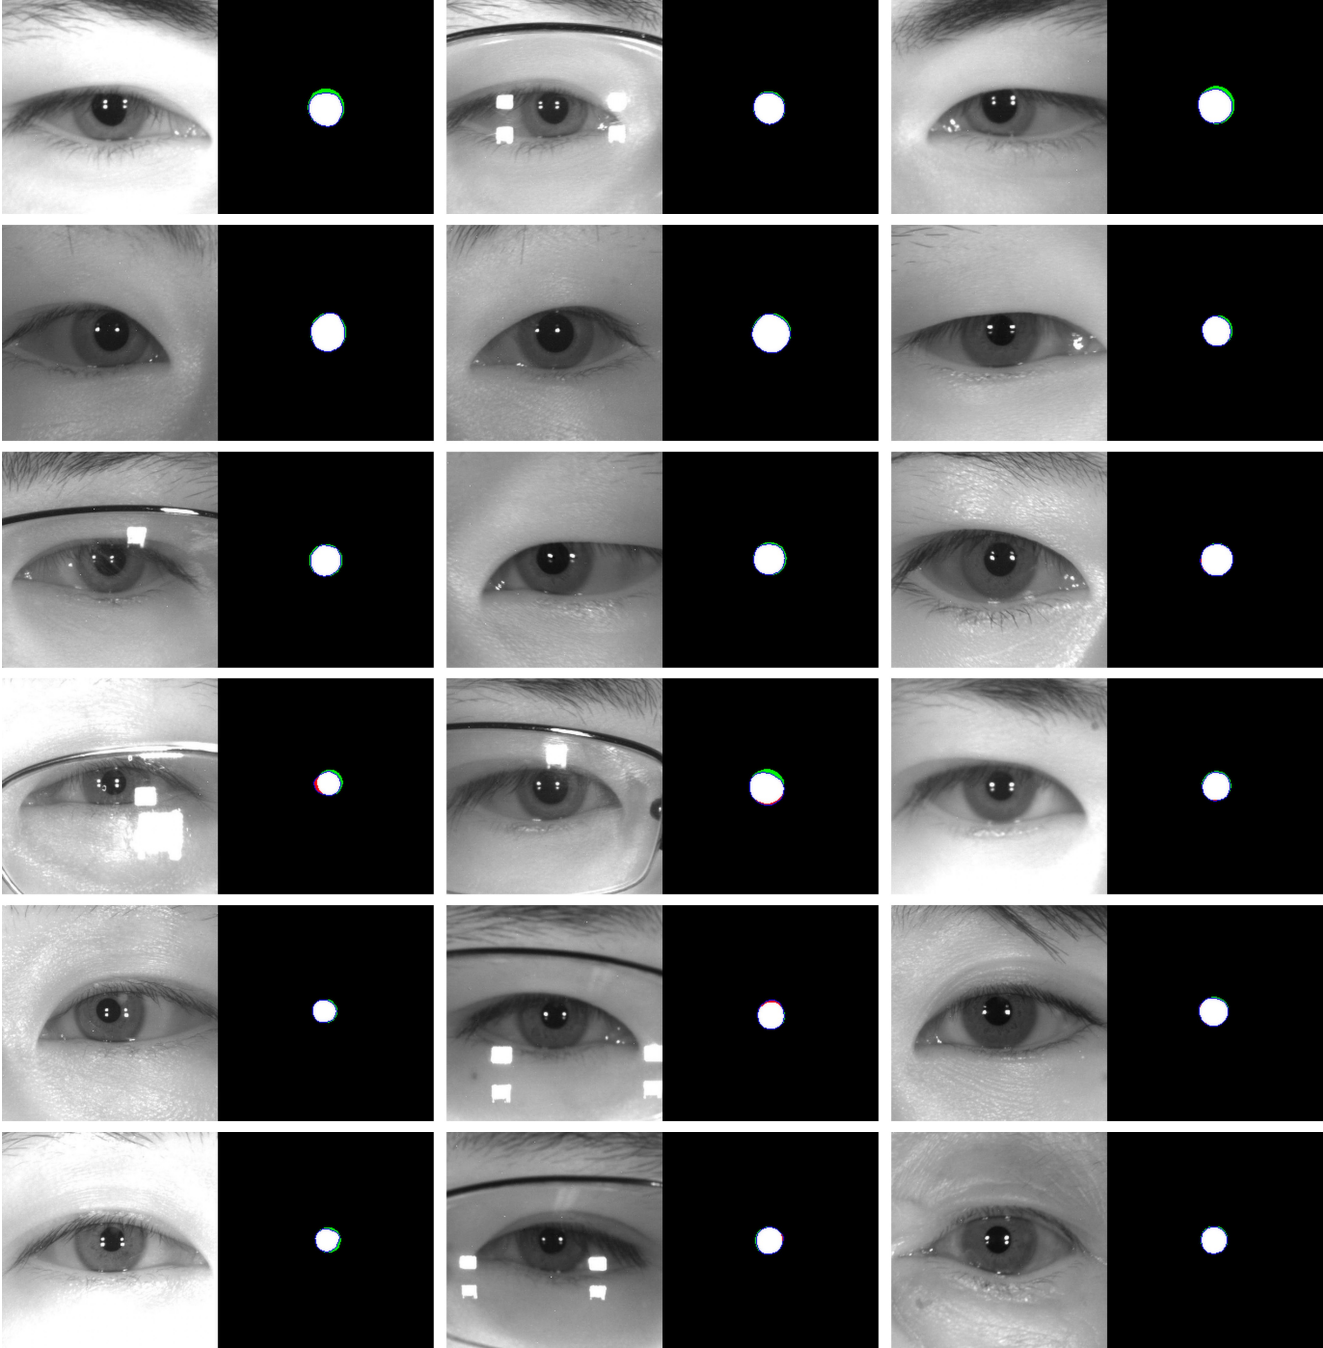

**H. Qualitative Visualization on REFUGE Dataset.**

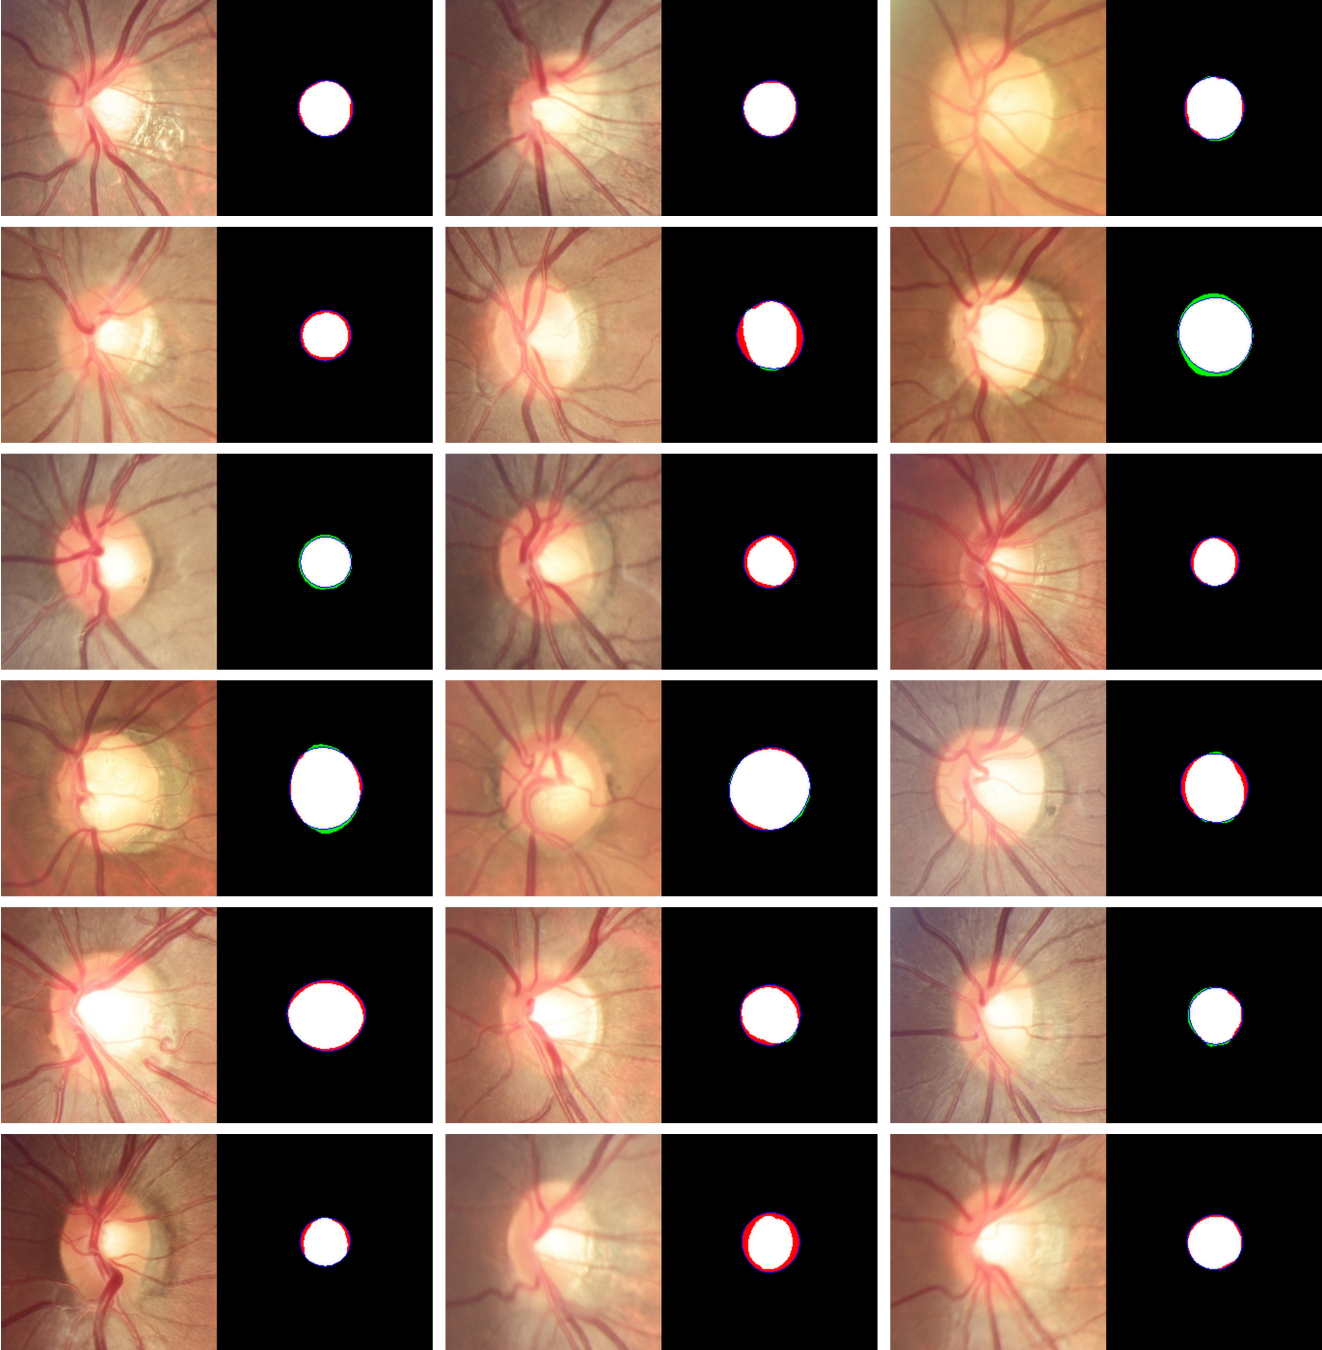

**I. Qualitative Visualization on RIM-ONE-r3 Dataset.**

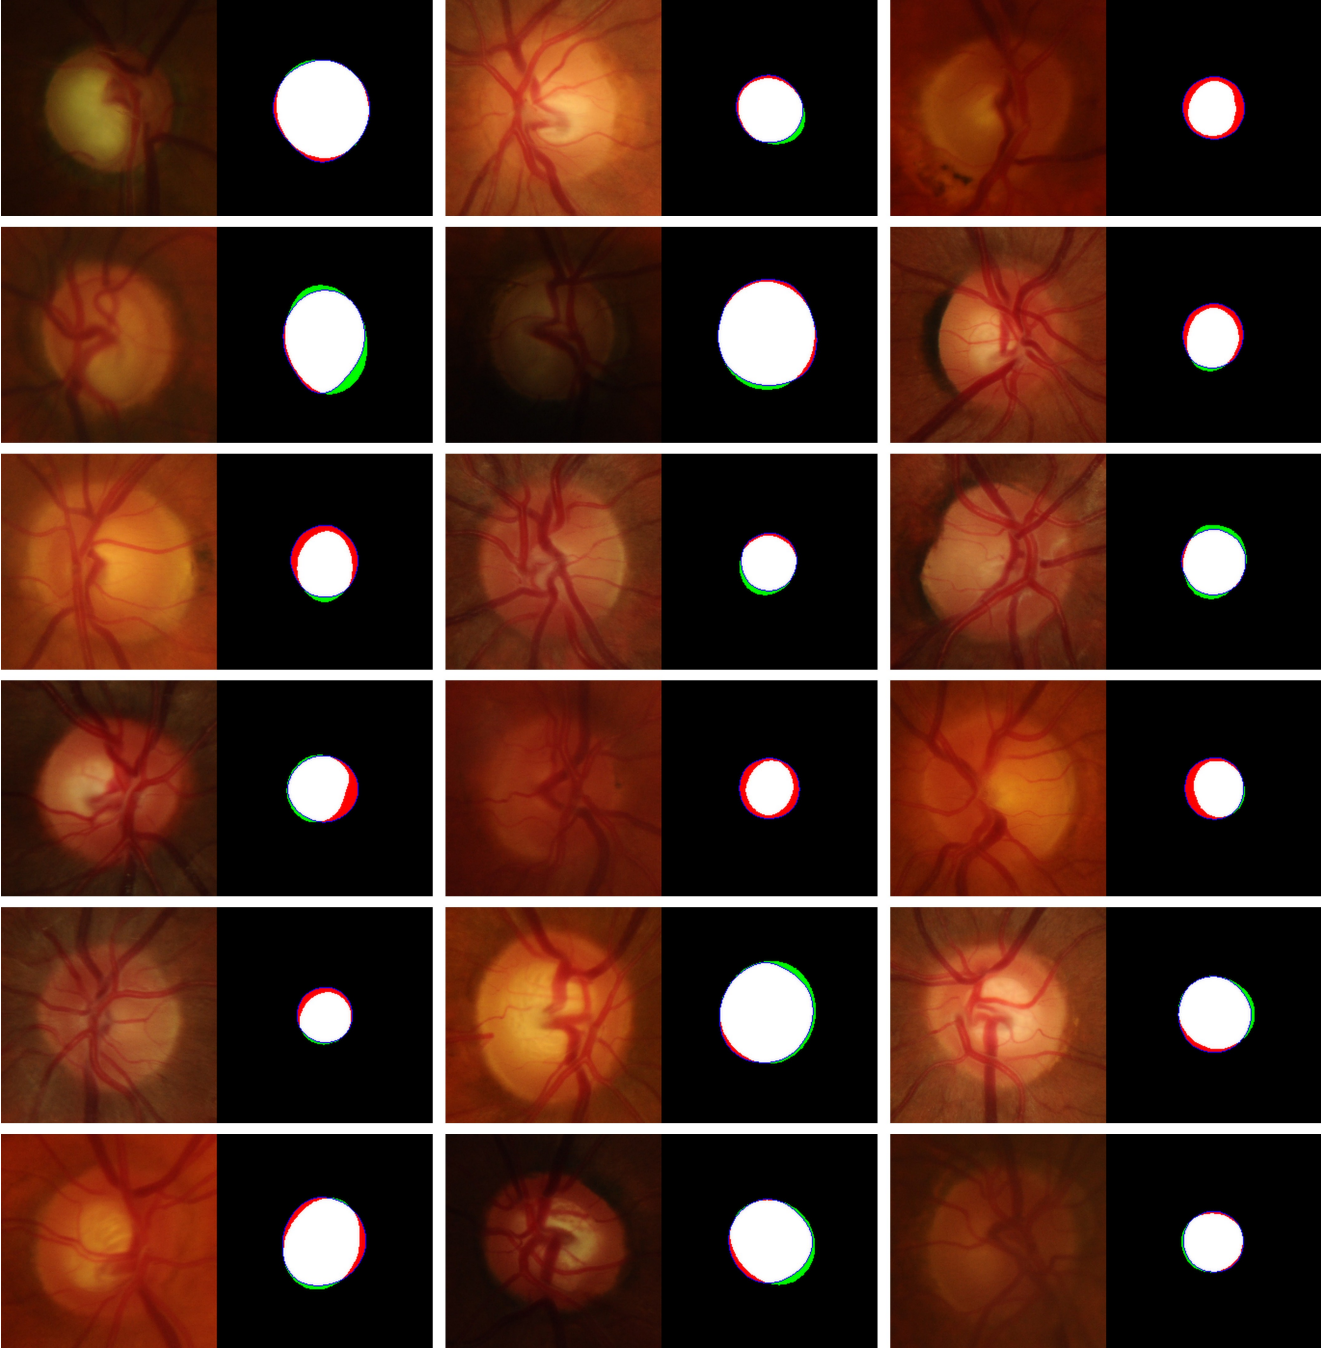

## J. Ten Trials Results for the Ablation Study

| Trial | Prior | Backbone | Dice  | IoU   | HD    | Backbone  | Dice  | IoU   | HD    | Backbone   | Dice  | IoU   | HD    |
|-------|-------|----------|-------|-------|-------|-----------|-------|-------|-------|------------|-------|-------|-------|
| 0     | -     | U-Net    | 83.02 | 70.97 | 12.56 | Swin-Unet | 85.32 | 74.40 | 7.530 | DeepLabV3p | 74.52 | 59.39 | 12.18 |
|       | 0th   |          | 82.93 | 70.83 | 12.52 |           | 85.19 | 74.20 | 7.516 |            | 74.49 | 59.35 | 12.17 |
|       | 1st   |          | 83.59 | 71.81 | 11.67 |           | 86.13 | 75.64 | 7.093 |            | 76.66 | 62.15 | 11.09 |
|       | 2nd   |          | 84.78 | 73.58 | 9.837 |           | 88.53 | 79.43 | 5.969 |            | 82.12 | 69.67 | 8.527 |
| 1     | -     | U-Net    | 84.28 | 72.83 | 11.04 | Swin-Unet | 86.65 | 76.44 | 6.965 | DeepLabV3p | 77.21 | 62.88 | 11.04 |
|       | 0th   |          | 84.22 | 72.74 | 10.99 |           | 86.56 | 76.31 | 6.942 |            | 77.16 | 62.81 | 11.04 |
|       | 1st   |          | 84.88 | 73.74 | 10.31 |           | 87.23 | 77.35 | 6.464 |            | 79.02 | 65.31 | 10.10 |
|       | 2nd   |          | 86.30 | 75.90 | 8.764 |           | 88.74 | 79.75 | 5.665 |            | 82.93 | 70.84 | 8.244 |
| 2     | -     | U-Net    | 83.66 | 71.91 | 11.99 | Swin-Unet | 88.72 | 79.73 | 6.137 | DeepLabV3p | 75.97 | 61.25 | 11.42 |
|       | 0th   |          | 83.31 | 71.39 | 11.86 |           | 88.69 | 79.67 | 6.117 |            | 75.95 | 61.23 | 11.42 |
|       | 1st   |          | 83.83 | 72.16 | 11.02 |           | 89.31 | 80.69 | 5.783 |            | 77.96 | 63.88 | 10.42 |
|       | 2nd   |          | 84.85 | 73.69 | 9.687 |           | 90.73 | 83.03 | 5.043 |            | 82.80 | 70.65 | 8.183 |
| 3     | -     | U-Net    | 85.48 | 74.65 | 9.804 | Swin-Unet | 86.29 | 75.89 | 8.377 | DeepLabV3p | 77.54 | 63.32 | 10.74 |
|       | 0th   |          | 85.50 | 74.68 | 9.640 |           | 86.14 | 75.65 | 8.256 |            | 77.53 | 63.30 | 10.73 |
|       | 1st   |          | 85.97 | 75.39 | 8.973 |           | 87.11 | 77.17 | 7.542 |            | 79.89 | 66.51 | 9.618 |
|       | 2nd   |          | 86.09 | 75.58 | 8.055 |           | 88.79 | 79.84 | 7.082 |            | 84.66 | 73.41 | 7.390 |
| 4     | -     | U-Net    | 84.98 | 73.88 | 10.20 | Swin-Unet | 87.01 | 77.01 | 10.59 | DeepLabV3p | 77.20 | 62.87 | 11.26 |
|       | 0th   |          | 84.93 | 73.80 | 10.16 |           | 86.81 | 76.69 | 10.50 |            | 77.19 | 62.85 | 11.25 |
|       | 1st   |          | 85.56 | 74.76 | 9.380 |           | 87.44 | 77.68 | 8.022 |            | 79.17 | 65.52 | 10.31 |
|       | 2nd   |          | 86.50 | 76.21 | 8.106 |           | 87.95 | 78.49 | 7.349 |            | 83.80 | 72.12 | 8.092 |
| 5     | -     | U-Net    | 83.74 | 72.02 | 11.86 | Swin-Unet | 84.35 | 72.94 | 7.777 | DeepLabV3p | 78.40 | 64.48 | 10.93 |
|       | 0th   |          | 83.57 | 71.78 | 11.78 |           | 84.26 | 72.81 | 7.777 |            | 78.36 | 64.41 | 10.93 |
|       | 1st   |          | 84.25 | 72.79 | 11.02 |           | 85.13 | 74.11 | 7.330 |            | 80.38 | 67.20 | 9.616 |
|       | 2nd   |          | 85.66 | 74.92 | 8.977 |           | 87.51 | 77.80 | 6.243 |            | 84.25 | 72.78 | 7.580 |
| 6     | -     | U-Net    | 83.95 | 72.34 | 11.49 | Swin-Unet | 83.07 | 71.05 | 8.197 | DeepLabV3p | 76.80 | 62.34 | 12.20 |
|       | 0th   |          | 83.68 | 71.94 | 11.40 |           | 82.99 | 70.92 | 8.190 |            | 76.81 | 62.35 | 12.20 |
|       | 1st   |          | 84.17 | 72.67 | 10.68 |           | 83.80 | 72.12 | 7.773 |            | 79.62 | 66.14 | 10.18 |
|       | 2nd   |          | 85.03 | 73.96 | 9.489 |           | 85.90 | 75.28 | 6.847 |            | 85.43 | 74.57 | 7.370 |
| 7     | -     | U-Net    | 83.68 | 71.94 | 11.69 | Swin-Unet | 84.58 | 73.28 | 8.912 | DeepLabV3p | 77.72 | 63.55 | 10.72 |
|       | 0th   |          | 83.44 | 71.59 | 11.58 |           | 84.11 | 72.58 | 8.783 |            | 77.69 | 63.52 | 10.71 |
|       | 1st   |          | 84.01 | 72.43 | 10.91 |           | 85.38 | 74.48 | 7.938 |            | 79.99 | 66.66 | 9.525 |
|       | 2nd   |          | 85.33 | 74.41 | 9.558 |           | 87.64 | 77.99 | 6.789 |            | 83.95 | 72.34 | 7.462 |
| 8     | -     | U-Net    | 85.03 | 73.96 | 10.39 | Swin-Unet | 86.99 | 76.98 | 6.555 | DeepLabV3p | 78.96 | 65.24 | 10.39 |
|       | 0th   |          | 84.91 | 73.77 | 10.30 |           | 86.93 | 76.89 | 6.539 |            | 78.96 | 65.23 | 10.38 |
|       | 1st   |          | 85.52 | 74.70 | 9.608 |           | 87.63 | 77.98 | 6.169 |            | 80.39 | 67.21 | 9.661 |
|       | 2nd   |          | 86.85 | 76.76 | 8.281 |           | 89.27 | 80.62 | 5.431 |            | 83.97 | 72.37 | 7.832 |
| 9     | -     | U-Net    | 83.50 | 71.67 | 11.96 | Swin-Unet | 85.82 | 75.16 | 8.329 | DeepLabV3p | 77.73 | 63.57 | 11.19 |
|       | 0th   |          | 83.27 | 71.33 | 11.77 |           | 85.27 | 74.32 | 8.193 |            | 77.69 | 63.51 | 11.18 |
|       | 1st   |          | 83.83 | 72.16 | 11.09 |           | 86.23 | 75.79 | 7.387 |            | 79.54 | 66.03 | 10.22 |
|       | 2nd   |          | 85.03 | 73.96 | 9.832 |           | 87.49 | 77.76 | 6.648 |            | 83.83 | 72.16 | 8.148 |
